# Supplementary material
Source: Springer Nature journal article supplement (https://www.springermedizin.de/resource/supplementary/12888_2012_1464_MOESM4_ESM.pdf/9480360)

**a. Power Law  
> Exponential**

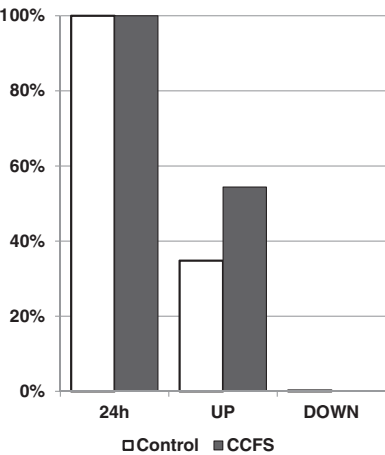

**b. Exponential  
> Power Law**

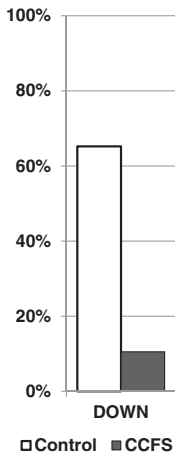

**c. Power Law Test**

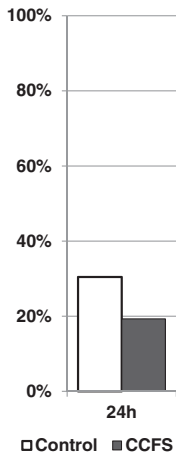

Supplement: MOESM4 [file 9480360]
